# Supplementary material for: Molecular Basis of TcdR-Dependent Promoter Activity for Toxin Production by Clostridioides difficile Studied by a Heterologous Reporter System
Source: MDPI journal article supplement (doi:10.3390/toxins15050306), 2023-04-23
Supplement: s1 [file s1]

# Supplementary Materials: Molecular Basis of TcdR-Dependent Promoter Activity for Toxin Production by *Clostridioides difficile* Studied by a Heterologous Reporter System

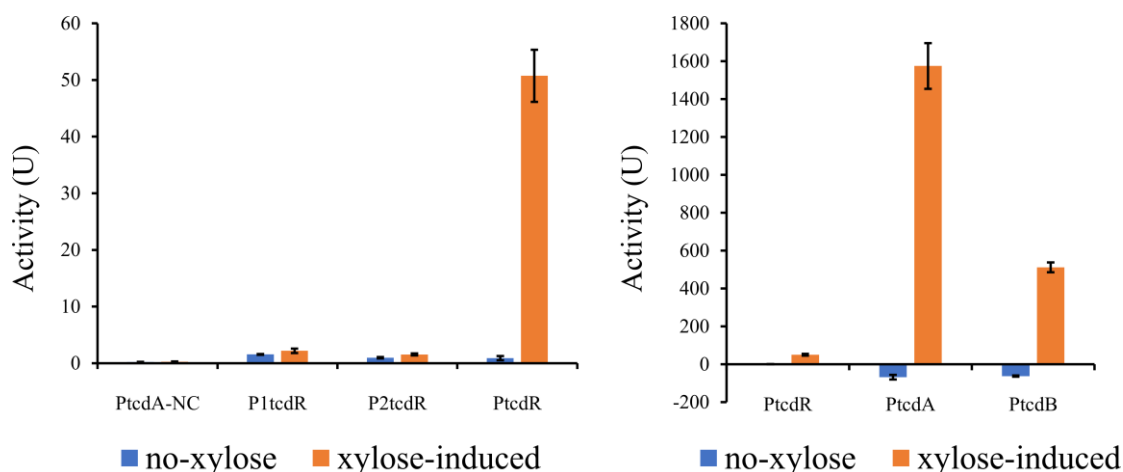

**Figure S1.** The activities of long-version TcdR-dependent promoters with and without the xylose induction. The activities shown in Figure 3A are the difference between the xylose-induced activity and the no-xylose activity.

**Table S1. Promoter sequences used in this study.** The shorter version promoters are underlined and the -35 and -10 elements are indicated in bold. The  $\sigma^D$ -dependent promoter is underlined with a dashed line.

| Promoter    | Sequence                                                                                                                                                                                                                                                                                                                                                                                                                                                                                                                                                                                                                                                                                                                                                                                                                                                                                                                                                                                                                                                                                                                                                                                                                                                                                                                                                                                                                                                                                                                                                               |
|-------------|------------------------------------------------------------------------------------------------------------------------------------------------------------------------------------------------------------------------------------------------------------------------------------------------------------------------------------------------------------------------------------------------------------------------------------------------------------------------------------------------------------------------------------------------------------------------------------------------------------------------------------------------------------------------------------------------------------------------------------------------------------------------------------------------------------------------------------------------------------------------------------------------------------------------------------------------------------------------------------------------------------------------------------------------------------------------------------------------------------------------------------------------------------------------------------------------------------------------------------------------------------------------------------------------------------------------------------------------------------------------------------------------------------------------------------------------------------------------------------------------------------------------------------------------------------------------|
| <i>PtcA</i> | CACAAAGATGGTGCATGGTCAGTTGGTAAAATCTATTAAGCTACATTAGTTACAGATATC<br>ACAACTATAATAGTTAAACATAGAAATATGTGTAAATTGTGATGGAAATTATTCAAAAA<br>CACAAAAATACGTGATGAAGGACAAAATGATATAGAAAATAAGTATCAAACCTTAATAA<br>ATGATTTAATTGATAGTTTAAAAGTTATAGGAAAAATATATAAAGAAATAAAAAACATTAA<br>AAAAATATAAGATATGTTTACAAATTACTATCAGACAATCTCCTTATCTAATAGAAGAG<br>TTAATGAGCTTAAAGAAATATTTACAATAGAAATCAAATTTTAGAATTAACCTTTATTGTAA<br><i>PtcB</i><br>AATCAATAACTTAATCTAAGAATATCTTAATTTTTATATTTTATATAGAACAAAGTTTACA<br>TATTTATTTTACAGACAACGCTTTTATTCAATCGAAGAGC<br>AACAAAATATTAAATAATTCTACTCTGATAGTTTGTTAAAAAAATAATAAAAAATATTAA<br>TAAACAAAAAATTATCTTAAGAGAGGAGAATGTTCTAAAATATAAAAAAGGTTTCT<br><i>P1tcdR</i><br>AGATTTTCAATAAAAGATACTATTTTAGTCTTGAAAATATTTAGTTTGAAAAGATTTTAATTT<br>AATGATTGATTAAGTTAAAAATGTGTATGTAATAAATTTTATTTTATTTATTGACTAAATTA<br>TAAAGTTTACATAATTATTTAATAATTATGTAATTGTTACTTGAAAATTGATCTATTTTAA<br>AA<br><i>P2tcdR</i><br>ATTTTAAAATCTAGTTATAACTTCAAAAAAGACTGAAAATTAAGAAAAAAGAAATATAA<br>ATATAAAATATGTCATATAGATTTTTTTTATTTTACTTTAATAAAATGATTTGTTTTTACA<br>ATACTTTTATTAATATAAAAGTTTATTGCTAAAATACTTTATTTA<br>AACAAAATATTAAATAATTCTACTCTGATAGTTTGTTAAAAAAATAATAAAAAATATTAA<br>TAAACAAAAAATTATCTTAAGAGAGGAGAATGTTCTAAAATATAAAAAAGGTTTCT<br>AGATTTTCAATAAAAGATACTATTTTAGTCTTGAAAATATTTAGTTTGAAAAGATTTTAATTT<br><i>PtcR</i><br>AATGATTGATTAAGTTAAAAATGTGTATGTAATAAATTTTATTTTATTTATTGACTAAATTA<br>TAAAGTTTACATAATTATTTAATAATTATGTAATTGTTACTTGAAAATTGATCTATTTTAA<br>AATCTAGTTATAACTTCAAAAAAGACTGAAAATTAAGAAAAAAGAAATATAAATATAAA<br>AATATGTCATATAGATTTTTTTTATTTTACTTTAATAAAATGATTTGTTTTTACAATACTTTA |

TTAATATAAAAGTTTATTGCTAAAATACTTTATTTATTAGAAAAAGATTACTAATTAATTAT  
TAAAATTAATGTATTCATAATGCATATTTTCATATAAAAATTTAATTTATTTGCCGATTATAT  
AATTATAATGACTGATTTAATTCCAATGTTGTCAAAATTTTCAAATAAATCATCATTA

**Table S2.** Bacterial strains and plasmids used in this study.

| Strains                  | Description                                                                                                                                                                                                                                                                                                            | Source                                           |
|--------------------------|------------------------------------------------------------------------------------------------------------------------------------------------------------------------------------------------------------------------------------------------------------------------------------------------------------------------|--------------------------------------------------|
| <i>Escherichia coli</i>  |                                                                                                                                                                                                                                                                                                                        |                                                  |
| TOP10                    | For plasmid construction.                                                                                                                                                                                                                                                                                              | Transgen Biotech                                 |
| <i>Bacillus subtilis</i> |                                                                                                                                                                                                                                                                                                                        |                                                  |
| 168                      | Wild-type host strain                                                                                                                                                                                                                                                                                                  | Lab stock                                        |
| 168R01                   | 168 <i>lacA</i> ::( <i>Pxyl-tcdR</i> , <i>Erm<sup>R</sup></i> ).<br>The intrinsic <i>lacA</i> of 168 was replaced with the xylose-induced expression cassette of <i>tcdR</i> .                                                                                                                                         | All strains below were constructed in this study |
| 168A01                   | 168 <i>amyE</i> ::( <i>PtcdA-lacZ</i> , <i>Spc<sup>R</sup></i> ).<br>The <i>amyE</i> of 168 was replaced with the LacZ reporter cassette containing the promoter of <i>tcdA</i> ( <i>PtcdA</i> ).                                                                                                                      |                                                  |
| 168AR01                  | 168 <i>lacA</i> ::( <i>Pxyl-tcdR</i> , <i>Erm<sup>R</sup></i> ), <i>amyE</i> ::( <i>PtcdA-lacZ</i> , <i>Spc<sup>R</sup></i> ).<br>The <i>amyE</i> of 168R01 was replaced with the LacZ reporter cassette containing the promoter of <i>tcdA</i> ( <i>PtcdA</i> ).                                                      |                                                  |
| 168BR01                  | 168 <i>lacA</i> ::( <i>Pxyl-tcdR</i> , <i>Erm<sup>R</sup></i> ), <i>amyE</i> ::( <i>PtcdB-lacZ</i> , <i>Spc<sup>R</sup></i> ).<br>The <i>amyE</i> of 168R01 was replaced with the LacZ reporter cassette containing the promoter of <i>tcdB</i> ( <i>PtcdB</i> ).                                                      |                                                  |
| 168RR01                  | 168 <i>lacA</i> ::( <i>Pxyl-tcdR</i> , <i>Erm<sup>R</sup></i> ), <i>amyE</i> ::( <i>P1tcdR-lacZ</i> , <i>Spc<sup>R</sup></i> ).<br>The <i>amyE</i> of 168R01 was replaced with the LacZ reporter cassette containing the first promoter of <i>tcdR</i> ( <i>P1tcdR</i> ).                                              |                                                  |
| 168RR02                  | 168 <i>lacA</i> ::( <i>Pxyl-tcdR</i> , <i>Erm<sup>R</sup></i> ), <i>amyE</i> ::( <i>P2tcdR-lacZ</i> , <i>Spc<sup>R</sup></i> ).<br>The <i>amyE</i> of 168R01 was replaced with the LacZ reporter cassette containing the second promoter of <i>tcdR</i> ( <i>P2tcdR</i> ).                                             |                                                  |
| 168RR04                  | 168 <i>lacA</i> ::( <i>Pxyl-tcdR</i> , <i>Erm<sup>R</sup></i> ), <i>amyE</i> ::( <i>PtcdR-lacZ</i> , <i>Spc<sup>R</sup></i> ).<br>The <i>amyE</i> of 168R01 was replaced with the LacZ reporter cassette containing the long promoter region of <i>tcdR</i> ( <i>P1tcdR</i> + <i>P2tcdR</i> + <i>Pσ<sup>D</sup></i> ). |                                                  |
| 168AR02                  | 168 <i>lacA</i> ::( <i>Pxyl-tcdR</i> , <i>Erm<sup>R</sup></i> ), <i>amyE</i> ::( <i>PtcdA-s-lacZ</i> , <i>Spc<sup>R</sup></i> ).<br>The <i>amyE</i> of 168R01 was replaced with the LacZ reporter cassette containing the short version promoter of <i>tcdA</i> ( <i>PtcdA-s</i> ).                                    |                                                  |
| 168BR02                  | 168 <i>lacA</i> ::( <i>Pxyl-tcdR</i> , <i>Erm<sup>R</sup></i> ), <i>amyE</i> ::( <i>PtcdB-s-lacZ</i> , <i>Spc<sup>R</sup></i> ).<br>The <i>amyE</i> of 168R01 was replaced with the LacZ reporter cassette containing the short version promoter of <i>tcdB</i> ( <i>PtcdB-s</i> ).                                    |                                                  |
| 168RR05                  | 168 <i>lacA</i> ::( <i>Pxyl-tcdR</i> , <i>Erm<sup>R</sup></i> ), <i>amyE</i> ::( <i>P1tcdR-s-lacZ</i> , <i>Spc<sup>R</sup></i> ).<br>The <i>amyE</i> of 168R01 was replaced with the LacZ reporter cassette containing a short version of promoter <i>P1tcdR</i> ( <i>P1tcdR-s</i> ).                                  |                                                  |
| 168RR06                  | 168 <i>lacA</i> ::( <i>Pxyl-tcdR</i> , <i>Erm<sup>R</sup></i> ), <i>amyE</i> ::( <i>P2tcdR-s-lacZ</i> , <i>Spc<sup>R</sup></i> ).<br>The <i>amyE</i> of 168R01 was replaced with the LacZ reporter cassette containing a short version of promoter <i>P2tcdR</i> ( <i>P2tcdR-s</i> ).                                  |                                                  |

---

|         |                                                                                                                                                                                                                                                                                                                                                                                               |
|---------|-----------------------------------------------------------------------------------------------------------------------------------------------------------------------------------------------------------------------------------------------------------------------------------------------------------------------------------------------------------------------------------------------|
| 168AR03 | <p>168 <i>lacA</i>::(<i>Pxyl-tcdR</i>, <i>Erm</i><sup>R</sup>), <i>amyE</i>::(<i>PtcdA-sR1-lacZ</i>, <i>Spc</i><sup>R</sup>).</p> <p>The <i>amyE</i> of 168R01 was replaced with the LacZ reporter cassette containing a mutant promoter (<i>PtcdA-sR1</i>) in which the -10 element of promoter <i>PtcdA-s</i> was replaced with the corresponding sequence in promoter <i>P1tcdR-s</i>.</p> |
| 168BR03 | <p>168 <i>lacA</i>::(<i>Pxyl-tcdR</i>, <i>Erm</i><sup>R</sup>), <i>amyE</i>::(<i>PtcdB-sA-lacZ</i>, <i>Spc</i><sup>R</sup>).</p> <p>The <i>amyE</i> of 168R01 was replaced with the LacZ reporter cassette containing a mutant promoter (<i>PtcdB-sA</i>) in which the -10 element of promoter <i>PtcdB-s</i> was replaced with the corresponding sequence in promoter <i>PtcdA-s</i>.</p>    |
| 168RR07 | <p>168 <i>lacA</i>::(<i>Pxyl-tcdR</i>, <i>Erm</i><sup>R</sup>), <i>amyE</i>::(<i>P1tcdR-sA-lacZ</i>, <i>Spc</i><sup>R</sup>).</p> <p>The <i>amyE</i> of 168R01 was replaced with the LacZ reporter cassette containing a mutant promoter (<i>P1tcdR-sA</i>) in which the -10 element of promoter <i>P1tcdR-s</i> was replaced with the corresponding sequence in promoter <i>PtcdA-s</i>.</p> |
| 168AR04 | <p>168 <i>lacA</i>::(<i>Pxyl-tcdR</i>, <i>Erm</i><sup>R</sup>), <i>amyE</i>::(<i>P<sub>A-1A</sub>-lacZ</i>, <i>Spc</i><sup>R</sup>).</p> <p>The <i>amyE</i> of 168R01 was replaced with the LacZ reporter cassette containing the mutant promoter (<i>P<sub>A-1A</sub></i>) in which the first position of the -10 element of <i>PtcdA-s</i> was mutated to base A.</p>                       |
| 168AR05 | <p>168 <i>lacA</i>::(<i>Pxyl-tcdR</i>, <i>Erm</i><sup>R</sup>), <i>amyE</i>::(<i>P<sub>A-1T</sub>-lacZ</i>, <i>Spc</i><sup>R</sup>).</p> <p>The <i>amyE</i> of 168R01 was replaced with the LacZ reporter cassette containing the mutant promoter <i>P<sub>A-1T</sub></i> in which the first position of the -10 element of <i>PtcdA-s</i> was mutated to base T.</p>                         |
| 168AR06 | <p>168 <i>lacA</i>::(<i>Pxyl-tcdR</i>, <i>Erm</i><sup>R</sup>), <i>amyE</i>::(<i>P<sub>A-2C</sub>-lacZ</i>, <i>Spc</i><sup>R</sup>).</p> <p>The <i>amyE</i> of 168R01 was replaced with the LacZ reporter cassette containing the promoter <i>P<sub>A-2C</sub></i> in which the second position of the -10 element of <i>PtcdA-s</i> was mutated to base C.</p>                               |
| 168AR07 | <p>168 <i>lacA</i>::(<i>Pxyl-tcdR</i>, <i>Erm</i><sup>R</sup>), <i>amyE</i>::(<i>P<sub>A-2G</sub>-lacZ</i>, <i>Spc</i><sup>R</sup>).</p> <p>The <i>amyE</i> of 168R01 was replaced with the LacZ reporter cassette containing the promoter <i>P<sub>A-2G</sub></i> in which the second position of the -10 element of <i>PtcdA-s</i> was mutated to base G.</p>                               |
| 168AR08 | <p>168 <i>lacA</i>::(<i>Pxyl-tcdR</i>, <i>Erm</i><sup>R</sup>), <i>amyE</i>::(<i>P<sub>A-3A</sub>-lacZ</i>, <i>Spc</i><sup>R</sup>).</p> <p>The <i>amyE</i> of 168R01 was replaced with the LacZ reporter cassette containing the promoter <i>P<sub>A-3A</sub></i> in which the third position of the -10 element of <i>PtcdA-s</i> was mutated to base A.</p>                                |
| 168AR09 | <p>168 <i>lacA</i>::(<i>Pxyl-tcdR</i>, <i>Erm</i><sup>R</sup>), <i>amyE</i>::(<i>P<sub>A-3T</sub>-lacZ</i>, <i>Spc</i><sup>R</sup>).</p> <p>The <i>amyE</i> of 168R01 was replaced with the LacZ reporter cassette containing the promoter <i>P<sub>A-3T</sub></i> in which the third position of the -10 element of <i>PtcdA-s</i> was mutated to base T.</p>                                |
| 168AR10 | <p>168 <i>lacA</i>::(<i>Pxyl-tcdR</i>, <i>Erm</i><sup>R</sup>), <i>amyE</i>::(<i>P<sub>A-4A</sub>-lacZ</i>, <i>Spc</i><sup>R</sup>).</p> <p>The <i>amyE</i> of 168R01 was replaced with the LacZ reporter cassette containing the promoter <i>P<sub>A-4A</sub></i> in which the fourth position of the -10 element of <i>PtcdA-s</i> was mutated to base A.</p>                               |

---

---

|         |                                                                                                                                                                                                                                                                                                                                                                                                            |
|---------|------------------------------------------------------------------------------------------------------------------------------------------------------------------------------------------------------------------------------------------------------------------------------------------------------------------------------------------------------------------------------------------------------------|
| 168AR11 | <p>168 <i>lacA</i>::(<i>Pxyl-tcdR</i>, <i>Erm<sup>R</sup></i>), <i>amyE</i>::(<i>P<sub>A-5C</sub>-lacZ</i>, <i>Spc<sup>R</sup></i>).</p> <p>The <i>amyE</i> of 168R01 was replaced with the LacZ reporter cassette containing the promoter <i>P<sub>A-5C</sub></i> in which the fifth position of the -10 element of <i>PtcdA-s</i> was mutated to base C.</p>                                             |
| 168AR12 | <p>168 <i>lacA</i>::(<i>Pxyl-tcdR</i>, <i>Erm<sup>R</sup></i>), <i>amyE</i>::(<i>PtcdA-sB-lacZ</i>, <i>Spc<sup>R</sup></i>).</p> <p>The <i>amyE</i> of 168R01 was replaced with the LacZ reporter cassette containing a mutant promoter (<i>PtcdA-sB</i>) in which the -10 element of promoter <i>PtcdA-s</i> was replaced with the corresponding sequence in promoter <i>PtcdB-s</i>.</p>                 |
| 168AR13 | <p>168 <i>lacA</i>::(<i>Pxyl-tcdR</i>, <i>Erm<sup>R</sup></i>), <i>amyE</i>::(<i>PtcdA-sR2-lacZ</i>, <i>Spc<sup>R</sup></i>).</p> <p>The <i>amyE</i> of 168R01 was replaced with the LacZ reporter cassette containing a mutant promoter (<i>PtcdA-sR2</i>) in which the -10 element of promoter <i>PtcdA-s</i> was replaced with the corresponding sequence in promoter <i>P2tcdR-s</i>.</p>              |
| 168RR08 | <p>168 <i>lacA</i>::(<i>Pxyl-tcdR</i>, <i>Erm<sup>R</sup></i>), <i>amyE</i>::(<i>P<sub>R-1C</sub>-lacZ</i>, <i>Spc<sup>R</sup></i>).</p> <p>The <i>amyE</i> of 168R01 was replaced with the LacZ reporter cassette containing the promoter <i>P<sub>R-1C</sub></i> in which the first position of the -10 element of <i>P1tcdR-s</i> was mutated to base C.</p>                                            |
| 168RR09 | <p>168 <i>lacA</i>::(<i>Pxyl-tcdR</i>, <i>Erm<sup>R</sup></i>), <i>amyE</i>::(<i>P<sub>R-2T</sub>-lacZ</i>, <i>Spc<sup>R</sup></i>).</p> <p>The <i>amyE</i> of 168R01 was replaced with the LacZ reporter cassette containing the promoter <i>P<sub>R-2T</sub></i> in which the second position of the -10 element of <i>P1tcdR-s</i> was mutated to base T.</p>                                           |
| 168RR10 | <p>168 <i>lacA</i>::(<i>Pxyl-tcdR</i>, <i>Erm<sup>R</sup></i>), <i>amyE</i>::(<i>P<sub>R-3C</sub>-lacZ</i>, <i>Spc<sup>R</sup></i>).</p> <p>The <i>amyE</i> of 168R01 was replaced with the LacZ reporter cassette containing the promoter <i>P<sub>R-3C</sub></i> in which the third position of the -10 element of the promoter <i>P1tcdR-s</i> is mutated to base C.</p>                                |
| 168RR11 | <p>168 <i>lacA</i>::(<i>Pxyl-tcdR</i>, <i>Erm<sup>R</sup></i>), <i>amyE</i>::(<i>P<sub>R-4C</sub>-lacZ</i>, <i>Spc<sup>R</sup></i>).</p> <p>The <i>amyE</i> of 168R01 was replaced with the LacZ reporter cassette containing the promoter <i>P<sub>R-4C</sub></i> in which the fourth position of the -10 element of <i>P1tcdR-s</i> was mutated to base C.</p>                                           |
| 168RR12 | <p>168 <i>lacA</i>::(<i>Pxyl-tcdR</i>, <i>Erm<sup>R</sup></i>), <i>amyE</i>::(<i>P<sub>R-5T</sub>-lacZ</i>, <i>Spc<sup>R</sup></i>).</p> <p>The <i>amyE</i> of 168R01 was replaced with the LacZ reporter cassette containing the promoter <i>P<sub>R-5T</sub></i> in which the fifth position of -10 element of <i>P1tcdR-s</i> was mutated to base T.</p>                                                |
| 168RR13 | <p>168 <i>lacA</i>::(<i>Pxyl-tcdR</i>, <i>Erm<sup>R</sup></i>), <i>amyE</i>::(<i>P<sub>R-m3</sub>-lacZ</i>, <i>Spc<sup>R</sup></i>).</p> <p>The <i>amyE</i> of 168R01 was replaced with the LacZ reporter cassette containing the promoter <i>P<sub>R-m3</sub></i> in which the second, third, and fifth position of the -10 element of <i>P1tcdR-s</i> was mutated to base T, C, and T, respectively.</p> |
| 168A02  | <p>168 <i>amyE</i>::(<i>PtcdA-s-lacZ</i>, <i>Spc<sup>R</sup></i>).</p> <p>The <i>amyE</i> of 168 was replaced with the LacZ reporter cassette containing the short version promoter of <i>tcdA</i> (<i>PtcdA-s</i>).</p>                                                                                                                                                                                   |
| 168B02  | <p>168 <i>amyE</i>::(<i>PtcdB-s-lacZ</i>, <i>Spc<sup>R</sup></i>).</p>                                                                                                                                                                                                                                                                                                                                     |

|                      |                                                                                                                                                                                                                                                                     |
|----------------------|---------------------------------------------------------------------------------------------------------------------------------------------------------------------------------------------------------------------------------------------------------------------|
|                      | <p>The <i>amyE</i> of 168 was replaced with the LacZ reporter cassette containing the short version promoter of <i>tcdB</i> (<i>PtcdB-s</i>).</p>                                                                                                                   |
| 168AR02-F63A         | <p>168 <i>lacA</i>::(<i>Pxyl-tcdR-F63A</i>, <i>Erm<sup>R</sup></i>), <i>amyE</i>::(<i>PtcdA-s-lacZ</i>, <i>Spc<sup>R</sup></i>).</p> <p>The <i>lacA</i> of 168A02 was replaced with the xylose-induced expression cassette of <i>tcdR-F63A</i>.</p>                 |
| 168AR02-I71A         | <p>168 <i>lacA</i>::(<i>Pxyl-tcdR-I71A</i>, <i>Erm<sup>R</sup></i>), <i>amyE</i>::(<i>PtcdA-s-lacZ</i>, <i>Spc<sup>R</sup></i>).</p> <p>The <i>lacA</i> of 168A02 was replaced with the xylose-induced expression cassette of <i>tcdR-I71A</i>.</p>                 |
| 168AR02-Y74A         | <p>168 <i>lacA</i>::(<i>Pxyl-tcdR-Y74A</i>, <i>Erm<sup>R</sup></i>), <i>amyE</i>::(<i>PtcdA-s-lacZ</i>, <i>Spc<sup>R</sup></i>).</p> <p>The <i>lacA</i> of 168A02 was replaced with the xylose-induced expression cassette of <i>tcdR-Y74A</i>.</p>                 |
| 168AR02-F63AI71A     | <p>168 <i>lacA</i>::(<i>Pxyl-tcdR-F63AI71A</i>, <i>Erm<sup>R</sup></i>), <i>amyE</i>::(<i>PtcdA-s-lacZ</i>, <i>Spc<sup>R</sup></i>).</p> <p>The <i>lacA</i> of 168A02 was replaced with the xylose-induced expression cassette of <i>tcdR-F63AI71A</i>.</p>         |
| 168AR02-I71AY74A     | <p>168 <i>lacA</i>::(<i>Pxyl-tcdR-I71AY74A</i>, <i>Erm<sup>R</sup></i>), <i>amyE</i>::(<i>PtcdA-s-lacZ</i>, <i>Spc<sup>R</sup></i>).</p> <p>The <i>lacA</i> of 168A02 was replaced with the xylose-induced expression cassette of <i>tcdR-I71AY74A</i>.</p>         |
| 168AR02-F63AY74A     | <p>168 <i>lacA</i>::(<i>Pxyl-tcdR-F63AY74A</i>, <i>Erm<sup>R</sup></i>), <i>amyE</i>::(<i>PtcdA-s-lacZ</i>, <i>Spc<sup>R</sup></i>).</p> <p>The <i>lacA</i> of 168A02 was replaced with the xylose-induced expression cassette of <i>tcdR-F63AY74A</i>.</p>         |
| 168AR02-F63AI71AY74A | <p>168 <i>lacA</i>::(<i>Pxyl-tcdR-F63AI71AY74A</i>, <i>Erm<sup>R</sup></i>), <i>amyE</i>::(<i>PtcdA-s-lacZ</i>, <i>Spc<sup>R</sup></i>).</p> <p>The <i>lacA</i> of 168A02 was replaced with the xylose-induced expression cassette of <i>tcdR-F63AI71AY74A</i>.</p> |
| 168BR02-F63A         | <p>168 <i>lacA</i>::(<i>Pxyl-tcdR-F63A</i>, <i>Erm<sup>R</sup></i>), <i>amyE</i>::(<i>PtcdB-s-lacZ</i>, <i>Spc<sup>R</sup></i>).</p> <p>The <i>lacA</i> of 168B02 was replaced with the xylose-induced expression cassette of <i>tcdR-F63A</i>.</p>                 |
| 168BR02-I71A         | <p>168 <i>lacA</i>::(<i>Pxyl-tcdR-I71A</i>, <i>Erm<sup>R</sup></i>), <i>amyE</i>::(<i>PtcdB-s-lacZ</i>, <i>Spc<sup>R</sup></i>).</p> <p>The <i>lacA</i> of 168B02 was replaced with the xylose-induced expression cassette of <i>tcdR-I71A</i>.</p>                 |
| 168BR02-Y74A         | <p>168 <i>lacA</i>::(<i>Pxyl-tcdR-Y74A</i>, <i>Erm<sup>R</sup></i>), <i>amyE</i>::(<i>PtcdB-s-lacZ</i>, <i>Spc<sup>R</sup></i>).</p> <p>The <i>lacA</i> of 168B02 was replaced with the xylose-induced expression cassette of <i>tcdR-Y74A</i>.</p>                 |
| 168BR02-F63AI71A     | <p>168 <i>lacA</i>::(<i>Pxyl-tcdR-F63AI71A</i>, <i>Erm<sup>R</sup></i>), <i>amyE</i>::(<i>PtcdB-s-lacZ</i>, <i>Spc<sup>R</sup></i>).</p> <p>The <i>lacA</i> of 168B02 was replaced with the xylose-induced expression cassette of <i>tcdR-F63AI71A</i>.</p>         |
| 168BR02-I71AY74A     | <p>168 <i>lacA</i>::(<i>Pxyl-tcdR-I71AY74A</i>, <i>Erm<sup>R</sup></i>), <i>amyE</i>::(<i>PtcdB-s-lacZ</i>, <i>Spc<sup>R</sup></i>).</p> <p>The <i>lacA</i> of 168B02 was replaced with the xylose-induced expression cassette of <i>tcdR-I71AY74A</i>.</p>         |
| 168BR02-F63AY74A     | <p>168 <i>lacA</i>::(<i>Pxyl-tcdR-F63AY74A</i>, <i>Erm<sup>R</sup></i>), <i>amyE</i>::(<i>PtcdB-s-lacZ</i>, <i>Spc<sup>R</sup></i>).</p> <p>The <i>lacA</i> of 168B02 was replaced with the xylose-induced expression cassette of <i>tcdR-F63AY74A</i>.</p>         |

168BR02-  
F63AI71AY74A

168 *lacA*::(P<sub>xyI</sub>-*tcdR*-F63AI71AY74A, *Erm*<sup>R</sup>), *amyE*::(P<sub>tcdB</sub>-*s-lacZ*,  
Sp<sup>c</sup><sup>R</sup>).  
The *lacA* of 168B02 was replaced with the xylose-induced  
expression cassette of *tcdR*-F63AI71AY74A.

**Table S3.** Plasmids used in this study.

| Plasmid | Description                                                                                                            | Source                                                |
|---------|------------------------------------------------------------------------------------------------------------------------|-------------------------------------------------------|
| pAX01   | Plasmid for gene integration and xylose-induced expression in<br><i>Bacillus subtilis</i>                              | Härtl et al. 2001, J. Bacteriol. 183,<br>2696-2699.   |
| pUC19   | The starting plasmid for constructing pUT series plasmids                                                              | Lab stock                                             |
| pAT01   | pAX01 derivative for integration and xylose-induced expression<br>of the <i>tcdR</i> gene in <i>Bacillus subtilis</i>  | All plasmids below were<br>constructed in this study. |
| pUT04   | pUC19 derivative for integration of the <i>lacZ</i> gene and P <sub>tcdA</sub> in<br><i>Bacillus subtilis</i>          |                                                       |
| pUT07   | pUC19 derivative for integration of the <i>lacZ</i> gene and P <sub>tcdB</sub> in<br><i>Bacillus subtilis</i>          |                                                       |
| pUT08   | pUC19 derivative for integration of the <i>lacZ</i> gene and P1 <i>tcdR</i> in<br><i>Bacillus subtilis</i>             |                                                       |
| pUT09   | pUC19 derivative for integration of the <i>lacZ</i> gene and P2 <i>tcdR</i> in<br><i>Bacillus subtilis</i>             |                                                       |
| pUT11   | pUC19 derivative for integration of the <i>lacZ</i> gene and P <i>tcdR</i> in<br><i>Bacillus subtilis</i>              |                                                       |
| pUT12   | pUT04 derivative for integration of the <i>lacZ</i> gene and P <i>tcdA</i> -s in<br><i>Bacillus subtilis</i>           |                                                       |
| pUT13   | pUT07 derivative for integration of the <i>lacZ</i> gene and P <i>tcdB</i> -s in<br><i>Bacillus subtilis</i>           |                                                       |
| pUT14   | pUT08 derivative for integration of the <i>lacZ</i> gene and P1 <i>tcdR</i> -s in<br><i>Bacillus subtilis</i>          |                                                       |
| pUT15   | pUT09 derivative for integration of the <i>lacZ</i> gene and P2 <i>tcdR</i> -s in<br><i>Bacillus subtilis</i>          |                                                       |
| pUT16   | pUT12 derivative for integration of the <i>lacZ</i> gene and P <i>tcdA</i> -sR1 in<br><i>Bacillus subtilis</i>         |                                                       |
| pUT17   | pUT14 derivative for integration of the <i>lacZ</i> gene and P1 <i>tcdR</i> -sA in<br><i>Bacillus subtilis</i>         |                                                       |
| pUT18   | pUT12 derivative for integration of the <i>lacZ</i> gene and promoter P <sub>A-1A</sub><br>in <i>Bacillus subtilis</i> |                                                       |
| pUT19   | pUT12 derivative for integration of the <i>lacZ</i> gene and promoter P <sub>A-1T</sub><br>in <i>Bacillus subtilis</i> |                                                       |
| pUT20   | pUT12 derivative for integration of the <i>lacZ</i> gene and promoter P <sub>A-2C</sub><br>in <i>Bacillus subtilis</i> |                                                       |
| pUT21   | pUT12 derivative for integration of the <i>lacZ</i> gene and promoter P <sub>A-2G</sub><br>in <i>Bacillus subtilis</i> |                                                       |
| pUT22   | pUT12 derivative for integration of the <i>lacZ</i> gene and promoter P <sub>A-3A</sub><br>in <i>Bacillus subtilis</i> |                                                       |
| pUT23   | pUT12 derivative for integration of the <i>lacZ</i> gene and promoter P <sub>A-3T</sub><br>in <i>Bacillus subtilis</i> |                                                       |
| pUT24   | pUT12 derivative for integration of the <i>lacZ</i> gene and promoter P <sub>A-4A</sub><br>in <i>Bacillus subtilis</i> |                                                       |
| pUT25   | pUT12 derivative for integration of the <i>lacZ</i> gene and promoter P <sub>A-5C</sub><br>in <i>Bacillus subtilis</i> |                                                       |

|       |                                                                                                                                    |
|-------|------------------------------------------------------------------------------------------------------------------------------------|
| pUT26 | pUT14 derivative for integration of the <i>lacZ</i> gene and promoter P <sub>R-1C</sub> in <i>Bacillus subtilis</i>                |
| pUT27 | pUT14 derivative for integration of the <i>lacZ</i> gene and promoter P <sub>R-2T</sub> in <i>Bacillus subtilis</i>                |
| pUT28 | pUT14 derivative for integration of the <i>lacZ</i> gene and the mutant promoter P <sub>R-3C</sub> in <i>Bacillus subtilis</i>     |
| pUT29 | pUT14 derivative for integration of the <i>lacZ</i> gene and the mutant promoter P <sub>R-4C</sub> in <i>Bacillus subtilis</i>     |
| pUT30 | pUT14 derivative for integration of the <i>lacZ</i> gene and the mutant promoter P <sub>R-5T</sub> in <i>Bacillus subtilis</i>     |
| pUT37 | pUT14 derivative for integration of the <i>lacZ</i> gene and the mutant promoter P <sub>tcdA-sB</sub> in <i>Bacillus subtilis</i>  |
| pUT38 | pUT14 derivative for integration of the <i>lacZ</i> gene and the mutant promoter P <sub>tcdB-sA</sub> in <i>Bacillus subtilis</i>  |
| pUT44 | pUT14 derivative for integration of the <i>lacZ</i> gene and the mutant promoter P <sub>tcdA-sR2</sub> in <i>Bacillus subtilis</i> |
| pAT12 | pAT01 derivative for xylose-induced expression of TcdR-F63A mutant in <i>Bacillus subtilis</i>                                     |
| pAT13 | pAT01 derivative for xylose-induced expression of TcdR-I71A mutant in <i>Bacillus subtilis</i>                                     |
| pAT14 | pAT01 derivative for xylose-induced expression of TcdR-Y74A mutant in <i>Bacillus subtilis</i>                                     |
| pAT15 | pAT01 derivative for xylose-induced expression of TcdR-I71AY74A mutant in <i>Bacillus subtilis</i>                                 |
| pAT16 | pAT01 derivative for xylose-induced expression of TcdR-F63AI71AY74A mutant in <i>Bacillus subtilis</i>                             |
| pAT17 | pAT01 derivative for xylose-induced expression of TcdR-F63AI71A mutant in <i>Bacillus subtilis</i>                                 |
| pAT18 | pAT01 derivative for xylose-induced expression of TcdR-F63AY74A mutant in <i>Bacillus subtilis</i>                                 |

**Table S4. Primers used in this study.** The mutation sites of TcdR-dependent promoters or the *tcdR* gene are shown in red letters.

| Primer name | Sequence (5' to 3')                                  | Used for                                                                                                                                  |
|-------------|------------------------------------------------------|-------------------------------------------------------------------------------------------------------------------------------------------|
| T01         | GAGTGC GGCCGCCCGCGGGAGCTCATGCAAAGTCTTTTTA<br>TGAATT  | Construction of plasmid pAT01                                                                                                             |
| T02         | CAAAGGGGGAAATGGGATCCTTACAAGTTAAAATAATTTT<br>CATAG    |                                                                                                                                           |
| T03         | AATTCATAAAAAGACTTTTGCATGAGCTCCCGCGGGCGGC<br>CGCACTC  |                                                                                                                                           |
| T04         | CTATGAAAATTATTTTAACTTGTAAGGATCCCATTTCCCCCT<br>TTG    |                                                                                                                                           |
| U01-F       | CTCTTTCACGTACCCATGGCACAAGATGGTGCATGGTCAG             | Construction of plasmids for the TcdR-dependent promoters ( <i>PtcdA</i> , <i>PtcdB</i> , <i>P1tcdR</i> , <i>P2tcdR</i> , <i>PtcdR</i> ). |
| U01-R       | CTTATTAGTTAATCTTTTCTCCTCTTCTATTAGATAAGGAG            |                                                                                                                                           |
| U02-F       | CTCCTTATCTAATAGAAGAGGAGAAAAGATTAACATAATAA<br>G       |                                                                                                                                           |
| U02-R       | CTGACCATGCACCATCTTTGTGCCATGGGTACGTGAAAGAG            |                                                                                                                                           |
| U03-F       | CTTTTCTCTTTCACGTACCCATGGTTAATGAGCTTAAAGAA<br>ATATTAC |                                                                                                                                           |

|                                                                                             |                                                                                        |                     |
|---------------------------------------------------------------------------------------------|----------------------------------------------------------------------------------------|---------------------|
| U03-R                                                                                       | CTCCTTATTAGTTAATCTTTTCTCGCTCTTCGATTGAATAAA<br>GACGTTG                                  | pUT07               |
| U04-F                                                                                       | GTAAATATTTCTTTAAGCTCATTAAACCATGGGTACGTGAAA<br>GAGAAAAG                                 | pUT07               |
| U04-R                                                                                       | CAACGTCTTTATTCAATCGAAGAGCGAGAAAAGATTAAC<br>ATAAGGAG                                    | pUT07               |
| U05-F                                                                                       | CTTTTCTCTTTCACGTACCCATGGAACAAAATATTAAATAA<br>TTCTACTC                                  | pUT08               |
| U05-R                                                                                       | CTCCTTATTAGTTAATCTTTTCTCTTTTAAAATAGATCAATTT<br>TCAAG                                   | pUT08               |
| U06-F                                                                                       | CTTGAAAATTGATCTATTTTAAAAGAGAAAAGATTAACATA<br>TAAGGAG                                   | pUT08               |
| U06-R                                                                                       | GAGTAGAATTATTTAATATTTTGTTCATGGGTACGTGAAA<br>GAGAAAAG                                   | pUT08               |
| U07-F                                                                                       | CTTTTCTCTTTCACGTACCCATGGATTTTAAAATCTAGTTAT<br>AACTTC                                   | pUT09               |
| U07-R                                                                                       | CTCCTTATTAGTTAATCTTTTCTCTTAAATAAAGTATTTTAGC<br>AATAAAC                                 | pUT09               |
| U08-F                                                                                       | GTTTATTGCTAAAATACTTTATTTAGAGAAAAGATTAACATA<br>ATAAGGAG                                 | pUT09               |
| U08-R                                                                                       | GAAGTTATAACTAGATTTTAAAATCCATGGGTACGTGAAA<br>GAGAAAAG                                   | pUT09               |
| U11-F                                                                                       | GCTTTTCTCTTTCACGTACCCATGGATTTTAAAATCTAGTTA<br>TAACTTC                                  | pUT11               |
| U11-R                                                                                       | CTCCTTATTAGTTAATCTTTTCTCATAATGATGATTATTTGA<br>AAATTTTG                                 | pUT11               |
| U12-F                                                                                       | CAAAATTTTCAAATAAATCATCATTATGAGAAAAGATTAA<br>CTAATAAGGAG                                | pUT11               |
| U12-R                                                                                       | GAAGTTATAACTAGATTTTAAAATCCATGGGTACGTGAAA<br>GAGAAAAGC                                  | pUT11               |
| Construction of plasmids for the short version promoters (PtdA-s, PtdB-s, P1tdR-s, P2tdR-s) |                                                                                        |                     |
| U13-F                                                                                       | CTCTTTCACGTACCCATGGCATTAAAAAAATATAAGATATG                                              | pUT12               |
| U13-R                                                                                       | CCATGGGTACGTGAAAGAG                                                                    | pUT12; pUT13; pUT14 |
| U13-2-F                                                                                     | CAGACAATCTCCTTATCTAATAAGAAAAGATTAACATAA<br>AG                                          | pUT12               |
| U13-2-R                                                                                     | TATTAGATAAGGAGATTGTCTG                                                                 | pUT12               |
| U14-F                                                                                       | CTCTTTCACGTACCCATGGATATTTTATATAGAACAAAG<br>GACAACGTCTTTATTCAATCGAGAAAAGATTAACATAATAA   | pUT13               |
| U14-2-F                                                                                     | G                                                                                      | pUT13               |
| U14-2-R                                                                                     | CGATTGAATAAAAGACGTTGTC                                                                 | pUT13               |
| U15-F                                                                                       | CTCTTTCACGTACCCATGGTTATTGACTAAATTATAAAG                                                | pUT14               |
| U15-2-F                                                                                     | TAATTATGTAATTGTTACTTGAGAAAAGATTAACATAAAG                                               | pUT14               |
| U15-2-R                                                                                     | CAAGTAACAATTACATAATTA                                                                  | pUT14               |
| U16-F                                                                                       | CTCTTTCACGTACCCATGGTTTAAATAAAATGATTTGTTTTTA<br>C                                       | pUT15               |
| U16-R                                                                                       | CCTTATTAGTTAATCTTTTCTTTTAGCAATAAACTTTATAT<br>ATATAAAGTTTATTGCTAAAAAGAAAAGATTAACATAATAA | pUT15               |
| U17-F                                                                                       | GG                                                                                     | pUT15               |
| U17-R                                                                                       | GTAAAAACAAATCATTTTATTAAACCATGGGTACGTGAAA<br>GAG                                        | pUT15               |



|       |                                                                |                                                                    |
|-------|----------------------------------------------------------------|--------------------------------------------------------------------|
| U18-F | CAAATTACTATCAGACAAT <b>TGTAAT</b> ATCTAATAAGAAAAG<br>ATTAAC    | Construction of plasmids for<br><i>PtcdA</i> -s mutants.<br>pUT16  |
| U18-R | GTTAATCTTTTCTTATTAGAT <b>ATTACA</b> ATTGTCTGATAGTAA<br>TTTG    | pUT16                                                              |
| U20-F | CAAATTACTATCAGACAAT <b>ATCCTT</b> ATCTAATAAGAAAAG              | pUT18                                                              |
| U20-R | CTTTTCTTATTAGATAAGGAT <b>ATTGTCTG</b> ATAGTAATTTG              | pUT18                                                              |
| U21-F | CAAATTACTATCAGACAAT <b>TCCTT</b> ATCTAATAAGAAAAG               | pUT19                                                              |
| U21-R | CTTTTCTTATTAGATAAGGA <b>AATTGTCTG</b> ATAGTAATTTG              | pUT19                                                              |
| U22-F | CAAATTACTATCAGACAAT <b>CCCTT</b> ATCTAATAAGAAAAG               | pUT20                                                              |
| U22-R | CTTTTCTTATTAGATAAGG <b>GGATTGTCTG</b> ATAGTAATTTG              | pUT20                                                              |
| U23-F | CAAATTACTATCAGACAAT <b>CGCCTT</b> ATCTAATAAGAAAAG              | pUT21                                                              |
| U23-R | CTTTTCTTATTAGATAAGG <b>CGATTGTCTG</b> ATAGTAATTTG              | pUT21                                                              |
| U24-F | CAAATTACTATCAGACAATCT <b>ACTT</b> ATCTAATAAGAAAAG              | pUT22                                                              |
| U24-R | CTTTTCTTATTAGATAAG <b>TAGATTGTCTG</b> ATAGTAATTTG              | pUT22                                                              |
| U25-F | CAAATTACTATCAGACAATCT <b>TCTT</b> ATCTAATAAGAAAAG              | pUT23                                                              |
| U25-R | CTTTTCTTATTAGATAAG <b>AGATTGTCTG</b> ATAGTAATTTG               | pUT23                                                              |
| U26-F | CAAATTACTATCAGACAATCTC <b>ATT</b> ATCTAATAAGAAAAG              | pUT24                                                              |
| U26-R | CTTTTCTTATTAGATAA <b>TGAGATTGTCTG</b> ATAGTAATTTG              | pUT24                                                              |
| U27-F | CAAATTACTATCAGACAATCT <b>CCCT</b> ATCTAATAAGAAAAG<br>ATTAAC    | pUT25                                                              |
| U27-R | GTTAATCTTTTCTTATTAGATA <b>GGGAGATTGTCTG</b> ATAGTAA<br>TTTG    | pUT25                                                              |
| U19-F | CATAATTATTTAATAATTA <b>CTCCTT</b> TGTTACTTGAGAAAAGA<br>TTAAC   | Construction of plasmids for<br><i>P1tcdR</i> -s mutants.<br>pUT17 |
| U19-R | GTTAATCTTTTCTCAAGTAACA <b>AAGGAG</b> TAATTATTAAATA<br>ATTATG   | pUT17                                                              |
| U28-F | CATAATTATTTAATAATTA <b>CGTAATTGT</b> ACTTGAGAAAAG              | pUT26                                                              |
| U28-R | CTTTTCTCAAGTAACAATTAC <b>GTAATTAT</b> TAAATAATTATG             | pUT26                                                              |
| U29-F | CATAATTATTTAATAATTAT <b>TAAATTGT</b> ACTTGAGAAAAG              | pUT27                                                              |
| U29-R | CTTTTCTCAAGTAACAATTA <b>ATAATTAT</b> TAAATAATTATG              | pUT27                                                              |
| U30-F | CATAATTATTTAATAATTATG <b>CAATTGT</b> ACTTGAGAAAAG              | pUT28                                                              |
| U30-R | CTTTTCTCAAGTAACAATT <b>GCATAATTAT</b> TAAATAATTATG             | pUT28                                                              |
| U31-F | CATAATTATTTAATAATTATGT <b>CATTGT</b> ACTTGAGAAAAG<br>ATTAAC    | pUT29                                                              |
| U31-R | GTTAATCTTTTCTCAAGTAACAAT <b>GACATA</b> ATTATTAAATA<br>ATTATG   | pUT29                                                              |
| U32-F | CATAATTATTTAATAATTATGTAT <b>TTGTTACT</b> TGAGAAAAG<br>ATTAAC   | pUT30                                                              |
| U32-R | GTTAATCTTTTCTCAAGTAACAA <b>ATACATA</b> ATTATTAAATA<br>ATTATG   | pUT30                                                              |
| U37-F | CAAATTACTATCAGACAAT <b>GTCTTT</b> ATCTAATAAGAAAAGA<br>TTAAC    | pUT37                                                              |
| U37-R | GTTAATCTTTTCTTATTAGAT <b>AAAGAC</b> ATTGTCTGATAGTAA<br>TTTG    | pUT37                                                              |
| U38-F | CATATTTATTTTCAAGACAAC <b>CTCCTT</b> ATTCAATCGAGAAAAG<br>ATTAAC | pUT38                                                              |
| U38-R | GTTAATCTTTTCTCGATTGAAT <b>AAGGAG</b> GTTGTCTGAAATA<br>AATATG   | pUT38                                                              |
| U44-F | CAAATTACTATCAGACAAT <b>AGTTTA</b> ATCTAATAAGAAAAG<br>ATTAAC    | pUT44                                                              |

|       |                                                        |                                                                                                                         |
|-------|--------------------------------------------------------|-------------------------------------------------------------------------------------------------------------------------|
| U44-R | GTTAATCTTTTCTTATTAGATTAAACTATTGTCTGATAGTAA<br>TTTG     | pUT44                                                                                                                   |
| T05-F | GCATCGCTTTTTTCTGAAGCGCTACTTAATTTAATAT                  | Construction of plasmids for<br>expression of TcdR mutants.<br>pAT12, pAT16, pAT17, pAT18<br>pAT12, pAT16, pAT17, pAT18 |
| T05-R | ATATTAAATTAAGTAGCGCTTCAGAAAAAAGCGATGC                  |                                                                                                                         |
| T06-F | GATTTATGAATATATTTGACTGCAATAGCATCGCTTTTTTCT<br>G        | pAT13, pAT17                                                                                                            |
| T06-R | CAGAAAAAAGCGATGCTATTGCAGTCAAATATATTCATAA<br>ATC        | pAT13, pAT17                                                                                                            |
| T07-F | CAGTAATGATTTATGAATAGCTTTGACTATAATAGCATCGC              | pAT14, pAT18                                                                                                            |
| T07-R | GCGATGCTATTATAGTCAAAGCTATTCATAAATCATTACTG              | pAT14, pAT18                                                                                                            |
| T08-F | CAGTAATGATTTATGAATAGCTTTGACTGCAATAGCATCGC<br>TTTTTCTG  | pAT15, pAT16                                                                                                            |
| T08-R | CAGAAAAAAGCGATGCTATTGCAGTCAAAGCTATTCATAA<br>ATCATTACTG | pAT15, pAT16                                                                                                            |
